### AUTHOR CORRECTION

In the Clinical Investigation by Ben-David *et al.*, which published in the January 2000 issue of ANESTHESIOLOGY (2000; 92:6-10), a clarification is necessary.

On page 7 in the first paragraph of the Methods section, the patient groups should have read as follows: "Patient groups were as follows: group A, 4 mg glucose-free bupivacaine (Astra, Södertälje, Sweden) plus 20  $\mu$ g fentanyl (the solution, from which 2 ml was used for the spinal injectate, was prepared by adding 100  $\mu$ g fentanyl to 4 ml glucose-free bupivacaine, 0.5%, which then was diluted further to 10 ml with 4 ml saline); and group B, 2 ml (10 mg) glucose-free bupivacaine, 0.5%. Therefore, injectate volume for both groups was 2 ml."

## ANNOUNCEMENTS

### PAIN MANAGEMENT CERTIFICATION AND RECERTIFICATION EXAMINATION

The American Board of Anesthesiology (ABA) will administer its PAIN MANAGEMENT examination *via* computer at more than 350 test centers on Saturday, September 15, 2001. The ABA will inform candidates of the test sites when the list is available. All applicants for initial certification in the subspecialty must satisfactorily complete 1 yr of training in a pain management program accredited by the Residency Review Committee for Anesthesiology by August 31, 2001; they also must be certified in anesthesiology by the ABA or scheduled for ABA oral examination in 2001. Physicians whose ABA pain management certificate soon will expire may apply to recertify in the subspecialty. Applicants may use the ABA Web site ([www.ABANE-S.org](http://www.ABANE-S.org)) to submit their application for the pain management examination to the ABA electronically. They also may download the application from the ABA Web site or request the form by fax (919-881-2575) or by writing to the ABA at 4101 Lake Boone Trail, Suite 510, Raleigh, North Carolina 27607-7506. The ABA must receive completed pain management applications by March 1, 2001.

### CRITICAL CARE MEDICINE CERTIFICATION AND RECERTIFICATION EXAMINATION

The American Board of Anesthesiology (ABA) will administer its CRITICAL CARE MEDICINE examination *via* computer at more than 200 test centers on Saturday, September 8, 2001. The ABA will inform candidates of the test sites when the list is available. All applicants for initial certification in the subspecialty must satisfactorily complete 1 yr of training in a critical care medicine program accredited by the Residency Review Committee for Anesthesiology by August 31, 2001; they also must be certified in anesthesiology by the ABA or scheduled for ABA oral examination in 2001. Physicians previously certified in critical care medicine by the ABA may apply to recertify in the subspecialty. Applicants may use the ABA Web site ([www.ABANE-S.org](http://www.ABANE-S.org)) to submit their application for the critical care medicine examination to the ABA electronically. They also may download the application from the ABA Web site or request the form by fax (919-881-2575) or by writing to the ABA at 4101 Lake Boone Trail, Suite 510, Raleigh, North Carolina 27607-7506. The ABA must receive completed critical care medicine applications by March 1, 2001.
